# Supplementary material
Source: PubMed Central journal article supplement (PMC138614)
Supplement: pnas_252348999_5.pdf [file pnas_252348999_5.pdf]

Block 2a

Basic types

Type 1 **ITIKNISDLIIAENKKRSGHPTTTTNGAGTQPANGSIAAASSETTQIS**-----

**F**

**FP**

Type 2 ETISNINKKLISDENAKRGGQSTNTTNGTGAQNNAQ-----

S

Type 3 *DTIKKISDLITEEHKKRGGQY~~ST~~ISGNGAQT~~DGHQ~~TTASSETSSGSSVSSVS*

Type 4 *KTIDNINKLISTENDKRNGQY~~TD~~MINGNGTQADGTQ~~GTT~~GSSETTQNS*-----

Recombinant types

Type 5 *DTIKKISDLITEEH***KKRSGHPTTTTNGAGTQPANGSIAAASSETTQIS**-----

Type 6 *KTIDNINKKLISDENAKRGGQY~~TD~~MINGNGTQADGTQ~~GTT~~GSSETTQNS*-----

Type 7 ETISNINKKLISDENAKRGGQY~~TD~~MINGNGTQADGTQ~~GTT~~GSSETTQNS-----

Type 8 ETISNINKKLISDENAKRGGQ*SISTISGNGAQT~~DGHQ~~PTTASSETSSGSSVSSVS*

Type 9 ETISNINKKLISDENAKRGGQSTNTTNGTGAQT~~DGHQ~~PTTASSETSSGSSVSSVS

Type 1 = Sal-1, T064, TF14, TF127, BD1, BD2, BD9, BP1, BP13, BP29, BP63, IN1, SK1, SK2, SK3, SK4, VM55

Type 2 = Belem, TO77, TE26, TG48, BP39, BR44, VM278

Type 3 = T107, TC22, TG44, BD4, BP30

Type 4 = TC28, TC103

Type 5 = TG57, TV400

Type 6 = TG46, BR07

Type 7 = TD29, TG55, BD6

Type 8 = TFF18

Type 9 = T124, T131, TG40

## Block 2b

### Types

Type 1    **GSSNSGSTGHGSSNSGSTGHGSSNSGSSGTGSSNSGSSGTGSTGN**  
Type 2    **GSSNSGSTGHGSSNSGSTVTGSTVTGSTGTGSTGT-----GSTGN**  
Type 3    **GSSNSGSTGHGSSSGTGSSGTGSSNSGSTGH-----GSTGN**  
Type 4    **GSSNSGSSGTGSSNSGSSGTGSSNSGSSGT-----GSTGN**  
Type 5    **GSSNSGSTGHGSSNSGSSGTGSTGTGSTGT-----GSTGN**  
Type 6    **GSSNSGSTGHGSSNSGSSSTGSSGTGSTGT-----GSTGN**  
Type 7    **GSSNSGSTGHGSSNSGSTGHGSSNSGSSGT-----GSTGN**  
Type 8    **GSSNSGSSSTGSSNSGSSSTGSSGT-----GSTGT**  
Type 9    **GSSNSGSTGHGSSNSGSSGTGSTGT-----GSTGN**  
Type 10   **GSSGTGSSSDSGSSGTGSSSDSGSSGT-----GSTGN**  
Type 11   **GSSNSGSTGHGSSNSGSSGT-----GSTGN**  
Type 12   **GSSGLGSSGTGSTGTGSTGT-----GSTGN**  
Type 13   **GSSGTGSSGTGSSSDSGSSGT-----GSTGN**  
Type 14   **GSSGTGLTRSGSSSDSGSSGT-----GSTGN**  
Type 15   **GSSGTGSSSDSGSSGT-----GSTGN**  
Type 16   **GSSNSGSSGT-----GSTGN**  
Type 17   **GSSNSGSSAT-----GSTGN**  
Type 18   **GSSGLGSSGT-----GSTGN**  
Type 19   **-----GSTGN**

Type 1 = IN1  
Type 2 = TG57, TV400  
Type 3 = VM55  
Type 4 = BP1, BP29  
Type 5 = SK1, SK2, SK4  
Type 6 = T064, TF14, TF127  
Type 7 = SK3  
Type 8 = Sal-1  
Type 9 = BD1, BD2, BD9  
Type 10 = TG55  
Type 11 = BP13, BP63  
Type 12 = T124, T131, TG40  
Type 13 = TD29  
Type 14 = TC28, TC103  
Type 15 = TG46, BD6, BR07  
Type 16 = T107, TG44, BD4, BP30  
Type 17 = TC22  
Type 18 = TFF18  
Type 19 = Belem, T077, TE26, TG48, BP39, BR44, VM278

Block 2c

Basic types

Type 1 -----GQSPPAADASSTNANYEAKKIIYQAVYNTIFYTNQLQ  
                                          T  
Type 2 TETGTRSSASSNTLSGGDGTTVVGTSSPAPAAPSSTNEDYDEKKKIYQAMYNGIFYTSOLE  
                                  S  A                                          N  
Type 3 -----ISHPAAPAASSPTDENYTNKKAIYQAVYNIIFYTNLKE  
                                          Q  
Type X -----RSSSQARADSRSTDTDYN AKKIIIFYQIYNGIFYTNQLE

Recombinant types

Type 4 -----RSSSQARADSRSTDTDYN AKKIIYQAVYNTIFYTNQLQ  
Type 5 -----RSSSQARADSRSTDTDYN AKKIIYQAVYNTIFYTNQLQ  
                                          I  P                  P  G  
Type 6 -----RSPSQAPAAPSSTNANYEAKKIIYQAVYNTIFYTNQLE  
Type 7 -----GQSPPAADASSTNANYEAKKIIYQAVYNTIFYTNQLE  
                                          T  
Type 8 -----GQSPPAAPSSTNANYEAKKIIYQAVYNTIFYTNQLE  
Type 9 -----ISHSAAPAASSPTDENYTNKKAIYQAVYNIIFYTNQLQ  
Type 10 TETGTQSSASSNTLSGGAGTTTVVGTSSPAPAAPSSTNANYEAKKIIYQAVYNTIFYTNQLE

Type 1 = Sal-1, TG57, TV400, BD1, BD2, BD9, IN1

Type 2 = Belem, TE26, VM278

Type 3 = TD29, TG46, TG55, BD6, BR07

Type 4 = BD4

Type 5 = T107, T131, T124, TC22, TG40, TG44, BP30

Type 6 = TFF18

Type 7 = T064, TF14, TF127, BP1, BP13, BP29, BP63, SK1, SK2, SK3, SK4

Type 8 = VM55

Type 9 = TC28, TC103

Type 10 = T077, TG48, BP39, BR44

Type x = A predicted basic type having type 5 sequence at the N terminal part and type 6 sequence at the C terminal part.

## Block 4

### Basic types

Type 1 **EQVAKEKEKLP**SDYPNTT**NLN-VHKEAESKIAELEKKIEAI**

**K**

**N**

Type 2 EQVEAEKKKLPKDNTTNTPLTDEQQKAAQKKIADLESQIVAN

I

Type 3 *EKIATEKGGKFPNNNLNVENPTD-EQKTAKSNIADLEKKIEAI*

*K*

### Recombinant types

Type 4 **EQVAKEKEKLP**KDNTT**TTNLN-VHKEAESKIAELEKKIEAI**

Type 5 **EQVAKEKEKLP**KDNTT**TTTLTA-EQKAAQ**SKIAELEKKIEAI

I

N

D

VD

Type 1 = Sal-1, T131, TG40, TFF18

Type 2 = Belem, T077, TE26, TG48, BP39, BR44, VM55, VM278

Type 3 = TG57, TV400, BD1, BD2, BD4, BD9, BP13, BP63, IN1,

SK1, SK2, SK3, SK4

Type 4 = T064, TC28, TC103, TF14, TF127

Type 5 = T107, T124, TC22, TG44, TG55, BD6, BP1, BP29, BP30

TD29, TG46, BR07

## Block 6

### Basic types

Type 1 **NKPTVAAADIVAKGQSLRGASETG--TTGNTVNAQTAVVQ-PQHQVNAVTVQPGTTGHQAQGGAEETQTNVQAAQVQQTTPAGAGGQVASTQTISQAPAPTQASPEPAPAAPPS**

QQ Q A  
P

TI S N V

Type 2 AKPAASAP--VTSGQLLRGSSEAATEVTTNAVITSEVQQQQQQQQQ----- (Q)nNQQQSQVVPAPAGDAQQVISTQPTSQSAAPGVSATPAP-----

G

### Recombinant types

Type 3 **NKPTVAAADIVAKGQSLRGASETG--TTGNTVNAQTAVVQ-PQHQVANAVTVQPGTTGHQAQGGAEETQTNVQAAQVQQTTPAGDAQQVISTQPTSQSAAPGVSATPAP-----**

Type 4 **NKPTVAAADIVAKGQSLRGASETG--TTGNTVNAQTAVVQQQQQQ----- (Q)nNQQQSQVVPAPAGDAQQVISTQPTSQSAAPGVSATPAP-----**

QSL

Type 1 = Sal-1, T064, T077, TF14, TF127, TC22, TC28, TC103, TG44, TG48, TG55, TG57, TFF18,

TV400, BD1, BD2, BD4, BD9, BP1, BP13, BP29, BP30, BP63, IN1, VM55

Type 2 = Belem, T107, TE26, TG46, BD6, BR07

Type 3 = T124, T131, TG40

Type 4 = TD29, BP39, BR44, SK1, SK2, SK3, SK4, VM278

## Block 8

### Basic types

Type 1 **LKSKAAAP--AQSAAKPSGQAGTTPVTTTTAPVTTTTVTPSPQTSVVTSTPPTP--QAEENRRVGGNSEEKPEADTAQVEKF**  
N Q

Type 2 *SNNKAAAP--AQSAAKPIGQAVVPQVAPPTPVVAPNSG-NTATPVTTTTVSPGTQSEVSTPVAGESEEEPEASVVQLEKI*

### Recombinant types

Type 3 *SNNKAAAP--AQSAAKPSGQAGTTPVTTTTAPVTTTTVTPSPQTSVVTSTPPTP--QAEENQRVGGNSEEKPEADTAQVEKF*  
N

Type 4 **LKSKAAAAGPAKPAAKPIGQAVVPQVAPPTPVVAPNSG-NTATPVTTNTTVSPGTQAEENQRVGGNSEEKPEADTAQVEKF**

Type 5 **LKSKAAAAGPAKPAAKPIGQAVVPQVAPPTPVVAPNSG-NTATPVTTNTTVSPGTQSEVSTPVAGESEEEPEASVVQLEKI**  
A

Type 1 = Sal-1, T077, T124, T131, TC28, TC103, TG40, TG48, TG55, TFF18, BD4, BP1, BP29

Type 2 = BP39, BR44

Type 3 = Belem, T064, TD29, TF14, TF127, TG57, TV400, BD1, BD2, BD9, BP13, BP30, BP63  
BR07, IN1, VM55, VM278

Type 4 = TC22

Type 5 = T107, TE26, TG44, TG46, BD6, SK1, SK2, SK3, SK4

## Block 10

### Types

Type 1 GASTTAATLP--VTVPSA--VPGGLPGAG--VPGAAAGLTPPPPAGS--VP-----ATGP--GAAA-----GSTEENVAAK  
Type 2 GASTTAATLP--VTVPSA--VPGGLPGAG--VPGAAAA-----VTVPGAG-----VP--AAGA--GAAA-----GSTEENVAAK  
Type 3 STSVA-----VTVPGAV-VPG-----VPTAAAAGSGASGA---VPPAGGPSPP-----ATGP--GAAA-----GSTEENVAAK  
Type 4 STSVA-----VTVPGAV-VPG-----VPTAAAAGSGASGA---VPPAGGPSPPATGGV-VPG-----VV-----ESAEAQTKAQ  
Type 5 STSVA-----VTVPGAV-VPG-----VPTAAAAGSGASGA---VPPAAAAGSGASGA--VP--PAGG--PSPPATGGV-VP--GVV-----ESAEAQTKAQ  
Type 6 STSVA-----VTVPGAV-----VTVPGAG-----VPAAGAG-----V-VPGAAAAGVVPGAA---VTVPGAGVPAAGVVPAGAPAGAAPSAPGAQEQTQTQ  
Type 7 GASAPAAAA---VTVPGAG-VPAAAA---VTVPGAG-----VPAAG-----V-VPGAPAGAA-----PAGAAPAG---AAPSAPGAQEQTQTQ  
Type 8 GASAPAAAA---VTVPGAG-VPAAAA---VTVPGAG-----VPAAG-----V-VPGA-----PAGAAPAG---AAPSAPGAQEQTQTQ  
Type 9 SASAPAAAA---VTVPGAGVVPGAAAAG-VVVPGAAAAGV-----VPGASAAG-----V-VPGASAAG-----V-VPGA-----PAG-----AASSAPGAQEQTQTQ  
Type 10 SASAPAAAA---VTVPGAG-VPAAGAGV---VPGAAAAGV-----VPGASAAG-----V-VPGA-----PAG-----AAPSAPGAQEQTQTQ  
Type 11 SASAPAAA---VTVPGAG-VPAAAA---VTVPGAG-----VPAAGAG-----V-VPGAAAAGVVPGA-----SAA-GVVPGAPAGAAPSAPGAQEQTQTQ  
Type 12 SASAPAAAAAAVTVPGAG-VPAAAA---VTVPGAG-----VPAAGAA-----VTVPGA---G-VPAAG---V-VPGA---SAA-GVVPGAPAGAAPSAPGAQEQTQTQ  
Type 13 SASAPAAAAAA-VTVPGAG-VPAAAA---VTVPGAG-----VPAAAAA-----VTVPGA---G-VPAAG---V-VPGA---PAG-----AAPSAPGAQEQTQTQ

Type 1 = Sal-1, T064, TD29, TF14, TF127, TG55, BD4, BP39, BR44, SK3

Type 2 = TE26

Type 3 = TG57, TV400, BP13, BP63, BR07, VM55, VM278

Type 4 = T077, T124, TC22, TC28, TC103, TG44, TG48, BP30, IN1

Type 5 = Belem, BP29

Type 6 = TFF18

Type 7 = BP1

Type 8 = BD1, BD2, BD9

Type 9 = T131, TG40

Type 10 = SK1, SK2, SK4

Type 11 = BD6

Type 12 = TG46

Type 13 = T107

## Block 12

### Basic types

Type 1 **DGVKTEIKKVEDDIKKQDEELKKLGNVNSQDSKKNEFI**  
Type 2 **DGVKTEIKKVEDDIKTHDEKLQKLGSEVSQNSEKTQLN**  
Type 3 TAVNEEVKKVEADIKAEDDKIKKIGSDSTKTTEKTQSM  
E  
Type 4 TAVNAQIKKVEDDINTQNEELKKIENEANKTAEKAKFT

### Recombinant types

Type 5 **DGVKTEIKKVEDDIKKQDEELKKIENDSTKTTEKAKFT**  
Type 6 **DGVKTEIKKVEADIKAEDDKIEKIGSDSTKTTEKTQSM**  
Type 7 TAVNAQ**IKKVEDDIKKQDEELKKIENEANKTAEKAKFT**  
Type 8 TAVNAQ**IKKVEDDIKAEDDKIKKIGSDSTKTTEKTQSM**  
Type 9 TAVNAQIKKVEDDINTQNEELKKIENDSTKTTEKAKFT  
Type 10 TAVNAQIKKVEADIKAEDDKIKKIENEANKAAEKTQSM  
Type 11 TAVNAQIKKVEADIKAEDDKIKTIGSDSTKTTEKTQSM  
Type 12 TAVNEEVKKVEADINTQNEELKKIENEANKTAEKAKFT  
Type 13 TAVNEEVKKVEADIKAEDDKIKKIENEANKAAEKTQSM

Type 1 = Sal-1, T064, TE26, TF14, TF127, BP30  
Type 2 = TG57, BD4, BP13, BP63, IN1, VM55, VM278  
Type 3 = Belem, BD1, BD2, BD9, SK1, SK2, SK3, SK4  
Type 4 = T107, BP39, BR44  
Type 5 = TG55  
Type 6 = TC28, TC103, TG46  
Type 7 = BR07  
Type 8 = TV400  
Type 9 = T077, T124, TG48, BP29  
Type 10 = TC22  
Type 11 = TG44  
Type 12 = BD6  
Type 13 = T131, TD29, TFF18, TG40, BP1
