# Supplementary material
Source: PubMed Central journal article supplement (PMC138614)

(a)

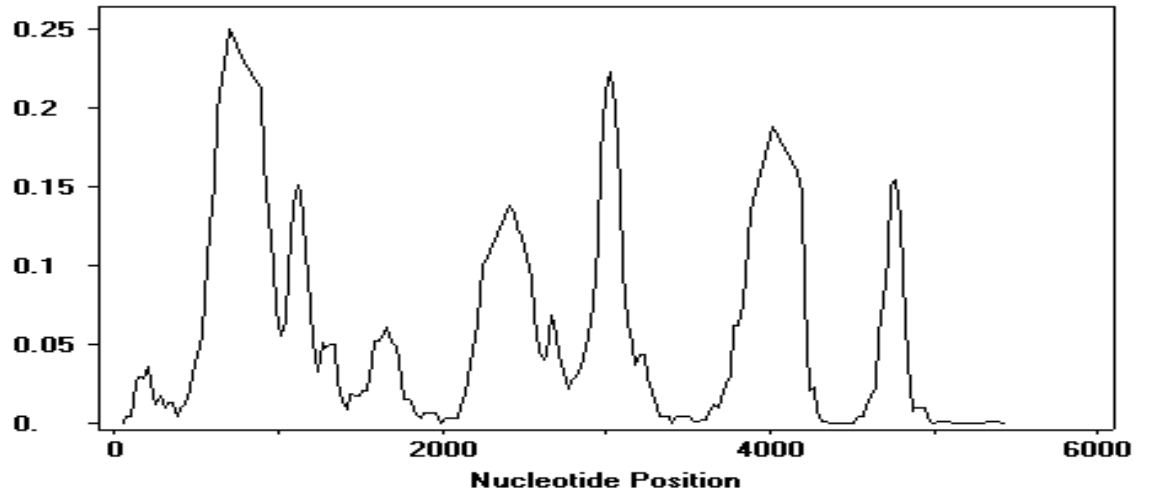

(b)

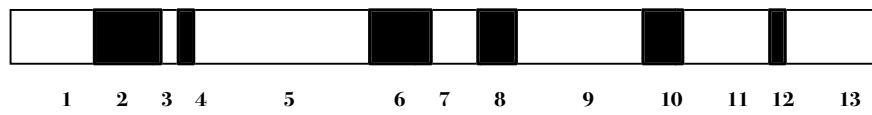

Supplement: pnas_252348999_3.pdf [file pnas_252348999_3.pdf]
